# Supplementary material for: Mechanisms of a Mycobacterium tuberculosis Active Peptide
Source: Pharmaceutics. 2023 Feb 6;15(2):540. doi: 10.3390/pharmaceutics15020540 (PMC9958537; doi:10.3390/pharmaceutics15020540)
Supplement: Supplementary file 1 [file pharmaceutics-15-00540-s001.zip › pharmaceutics-2182065-supplementary.pdf]

# Supplementary Materials: Mechanisms of a *Mycobacterium tuberculosis* Active Peptide

Komal Umashankar Rao, Ping Li, Charlotte Welinder, Erik Tenland, Pontus Gourdon, Erik Sturegård, James C. S. Ho and Gabriela Godaly

**Table S1.** Antibiotic resistance profile of the clinical MDR isolate.

| Antibiotic   | Sensitive (S) or Resistant (R) |
|--------------|--------------------------------|
| Linezolid    | S                              |
| Kanamycin    | S                              |
| Amikacin     | S                              |
| Ofloxacin    | S                              |
| Moxifloxacin | S                              |
| Rifampicin   | R                              |
| PAS          | S                              |
| Ethambutol   | S                              |
| Ethionamide  | S                              |
| Capreomycin  | S                              |
| Isoniazid    | R                              |
| Pyrazinamide | S                              |

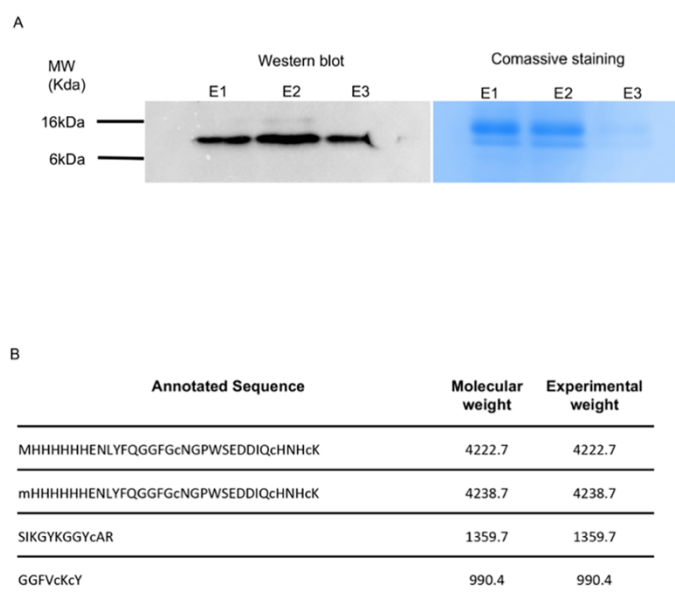

**Figure S1.** Confirmation of recombinant NZX. **(A)** NZX protein bands observed via western blot and commissive staining obtained from *E. coli* BL21 lysate. One distinct protein band was detected in the first three elution samples detected by western blot using anti-his secondary antibody. A band at the same molecular weight was seen for commissive staining. **(B)** Identity of NZX was confirmed by mass spectrometry from a pooled sample (elution1, 2 and 3).

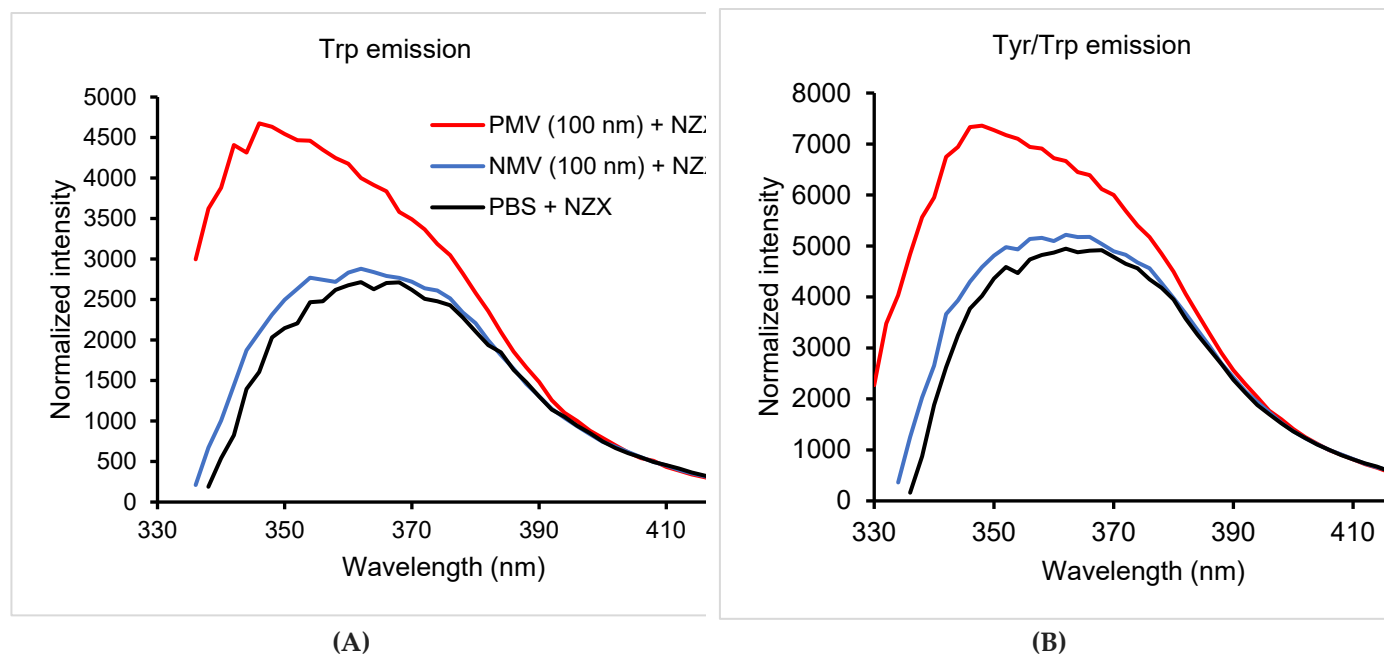

**Figure S2.** The non-normalized spectra of intrinsic Trp **(A)** Trp + Tyr **(B)** and emission spectra of the peptide when interacting with the LUV at pH 7.4.

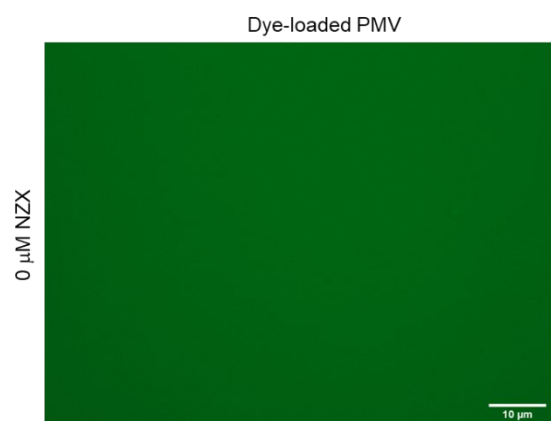

**Figure S3.** A control image with liposomes without the peptide.
